# Supplementary material for: An inorganic capping strategy for the seeded growth of versatile bimetallic nanostructures
Source: Royal Society of Chemistry journal article supplement (doi:10.1039/c5nr04614a), 2015-01-01
Supplement: c5nr04614a1.pdf [file c5nr04614a1.pdf]

# Supporting Information

## An inorganic capping strategy for the seeded growth of versatile bimetallic nanostructures

Yuchen Pei, Raghu V. Maligal–Ganesh, Chaoxian Xiao, Tian–Wei Goh, Kyle Brahler, Jeffrey A. Gustafson and Wenyu Huang\*

---

<sup>a</sup> Ames Laboratory, U.S. Department of Energy  
Department of Chemistry, Iowa State University, Ames, 50011, USA  
E-mail: whuang@iastate.edu

### 1. Synthesis of Pt@mSiO<sub>2</sub>

Pt@mSiO<sub>2</sub> was synthesized by following literature with some modifications.<sup>1</sup> 103 mg K<sub>2</sub>PtCl<sub>4</sub> (Acros Organics) and 8.4 g tetradecyltrimethyl–ammonium bromide (TTAB, Sigma Aldrich) were dissolved in 200 mL H<sub>2</sub>O with sonication. The cloudy solution was then placed in a 50 °C oil bath under vigorous stirring until a clear and homogenous Pt–TTAB solution appeared. 284 mg NaBH<sub>4</sub> (Alfa Aesar) was dissolved in 15 mL ice cold H<sub>2</sub>O in advance. Aqueous NaBH<sub>4</sub> solution was then injected quickly into the clear Pt–TTAB mixture. After sealed with a septum, a needle was inserted to release the gas pressure. The mixture was kept under 50 °C with vigorous stirring for 24 hrs. The needle was removed after reacting 20 min. The brown Pt colloidal solution was centrifuged at 4000 rpm for 4 times (30 min each) to remove large Pt NPs. The uniform Pt nanoparticles (NPs) were then concentrated in around 20 mL H<sub>2</sub>O after collecting the solids by centrifuging at 14000 rpm for 15 min twice. The concentrated Pt NPs aqueous solution was diluted to 150 mL with H<sub>2</sub>O and 8 mL 0.05 M NaOH (EMD)/H<sub>2</sub>O solution was added to obtain a pH of ~ 11. After stirring for 10 min, 3 mL 10% tetraethyl orthosilicate (TEOS, Sigma Aldrich) methanol solution was slowly added to the above Pt NPs–NaOH solution by using a syringe. The Pt@mSiO<sub>2</sub> was achieved after sealed and stirred for 24 hrs at room temperature. As–synthesized Pt@mSiO<sub>2</sub> was concentrated into 20 mL H<sub>2</sub>O by centrifuge at 14000 rpm for 20 min twice. Further purification to remove surfactants was conducted in 150 mL 10 % HCl–methanol reflux at 90 °C for 24 hrs. After separation (14000 rpm, 20 min) and washing with methanol 3 times, Pt@mSiO<sub>2</sub> was obtained and stored in methanol.

### 2. Synthesis of Pd@mSiO<sub>2</sub>

Pd@mSiO<sub>2</sub> was synthesized by following similar synthetic steps as Pt@mSiO<sub>2</sub>. Pd NPs were obtained by the seeded growth approach. The Pd seed solution was made by mixing 250 μL 10 mM K<sub>2</sub>PdCl<sub>4</sub>/H<sub>2</sub>O solution (Acros Organics), 450 μL 20 mM NaBH<sub>4</sub>, 30 mg TTAB, and 9.3 mL H<sub>2</sub>O. We then added 3 mL Pd seed solution and 20 mL 40 mM ascorbic acid (Sigma Aldrich) to a pre–made mixture of 25 mL 10 mM K<sub>2</sub>PdCl<sub>4</sub> solution, 8.4 g TTAB, 38 mg NaI, and 200 mL H<sub>2</sub>O in a 60 °C oil bath. The growth solution was kept at 60 °C with vigorous stirring for 3 hrs. Pd NPs were centrifuged at 3000 rpm for 3 times to remove large particles. Coating mSiO<sub>2</sub> shell process and methanol/HCl purification were conducted the same procedures as that for Pt@mSiO<sub>2</sub>.

### 3. Seeded growth of bimetallic@mSiO<sub>2</sub> (PtM@mSiO<sub>2</sub>)

Proper amounts of secondary metal precursors, such as  $\text{CuCl}_2$  (J. T. Backer Chemicals),  $\text{Ni}(\text{NO}_3)_2 \cdot 6\text{H}_2\text{O}$  (Sigma Aldrich),  $\text{RhCl}_3 \cdot x\text{H}_2\text{O}$  (Alfa Aesar) and  $\text{K}_2\text{PdCl}_4$ , were dissolved in 80 mL tetraethylene glycol (TEG, Fisher Scientific) to form a clear metal precursor–TEG solution. Proper volumes of Pt@mSiO<sub>2</sub> methanol solution were measured according to Pt metal quantity determined by ICP–MS. After centrifuging at 14000 rpm 20 min, the concentrated Pt@mSiO<sub>2</sub> was transferred into the above 80 mL metal–TEG solution (with small amounts of acetone added to help transfer). After sonication for dispersion, the brown TEG solution containing Pt@mSiO<sub>2</sub> and secondary metal precursor was then placed under vacuum to get rid of methanol and acetone remnants. After purging and protecting the solution with argon, the brown mixture was placed in a heating mantle with specific heating programs to reduce the secondary metal precursor on Pt@mSiO<sub>2</sub>. After cooling down to room temperature, the PtM@mSiO<sub>2</sub>–TEG solution was diluted twice its volume with acetone or methanol to help effective separation during centrifugation. PtM@mSiO<sub>2</sub> was collected by centrifuge and further washed with acetone or methanol 3 more times and stored in methanol for further characterization.

PdPt@mSiO<sub>2</sub> starting from Pd@mSiO<sub>2</sub> was synthesized via similar route using Pd@mSiO<sub>2</sub> as seeds instead and  $\text{K}_2\text{PtCl}_4$  as the secondary metal precursor. The PdPt@mSiO<sub>2</sub> control synthesized in oleylamine by mixing Pd@mSiO<sub>2</sub> and  $\text{H}_2\text{PtCl}_6$  (control v in Table 1) followed the similar synthetic conditions as that of the PtPd NPs control in Part 4.

The heating program for  $\text{H}_2\text{PtCl}_6$ ,  $\text{K}_2\text{PtCl}_4$ ,  $\text{K}_2\text{PdCl}_4$  and  $\text{RhCl}_3 \cdot x\text{H}_2\text{O}$ : 30 °C to 180 °C in 1 hr, maintained at 180 °C for 2 hrs, and then ramping up to 280 °C in 2 hrs and maintained at 280 °C for another 2 hrs. For  $\text{Ni}(\text{NO}_3)_2 \cdot 6\text{H}_2\text{O}$  and  $\text{CuCl}_2$ , reaction solution was heated up to 280 °C in 2 hrs from 30 °C and maintained at 280 °C for another 2 hrs.

#### 4. Seeded growth of PtPd NPs control

The major synthesis of PtPd NPs controls was followed by literature with modifications.<sup>2</sup> Pt or Pd NPs were synthesised as above and metal concentration was measured by ICP–MS. Normally, appropriate amounts of Pt or Pd NPs solutions (3 mg metal) was centrifuged and dispersed in 15 mL oleylamine (Sigma Aldrich), followed by the addition of Pd(acac)<sub>2</sub> (Sigma Aldrich) or  $\text{H}_2\text{PtCl}_6$  (Acros Organics) with certain calculated ratios. The solution was heated up to 180 °C for 1 hr and maintained at 180 °C for 1 hr under argon protection. The dark brown mixture was separated and stored in ethanol or hexanes for further use. PtPd/SiO<sub>2</sub> catalyst was made by wetness impregnation. PtPd NPs ethanol/hexanes solution was loaded on silica gel (Sigma Aldrich) and dried (0.5 mg Pt/60 mg silica gel) in vacuum.

#### 5. Si contents in the supernatant solution after synthesis

The Si contents of the supernatant solution were measured by ICP–MS using collision–induced dissociation mode under He flow to weaken the interference of COH species. After the synthesis, Pt@mSiO<sub>2</sub> and PtPd@mSiO<sub>2</sub> NPs were removed from the reaction solution via centrifugation, and the supernatant was then collected for ICP–MS. Typically, 5 mL of the supernatant was mixed with 5 μL of 50 wt.% HF at room temperature for overnight to dissolve mSiO<sub>2</sub>. The HF–treated supernatant was then diluted with aqua regia and ultrapure water into certain concentration which is proper for ICP–MS analysis.

6. Figures and tables.

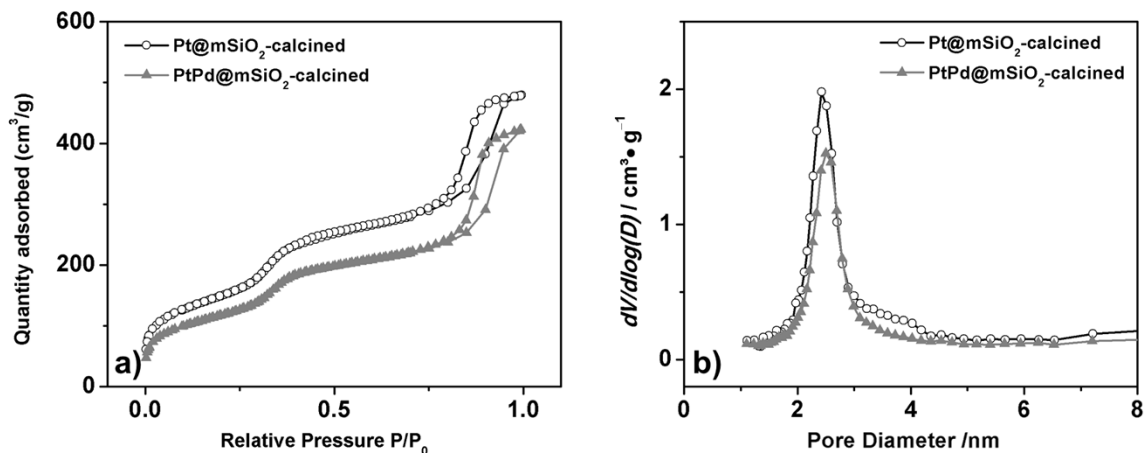

Figure S1. a) Nitrogen adsorption isotherms and b) Pore size distributions of Pt@mSiO<sub>2</sub> and PtPd@mSiO<sub>2</sub>.

Table S1. Summary of BET specific area, average pore size and pore volume of Pt@mSiO<sub>2</sub> and PtPd@mSiO<sub>2</sub>.

| Items <sup>a)</sup>    | Specific area /cm <sup>2</sup> ·g <sup>-1</sup> | Pore size /nm <sup>b)</sup> | Pore volume /cm <sup>3</sup> ·g <sup>-1</sup> |
|------------------------|-------------------------------------------------|-----------------------------|-----------------------------------------------|
| Pt@mSiO <sub>2</sub>   | 503.4                                           | 2.4                         | 0.66                                          |
| PtPd@mSiO <sub>2</sub> | 396.0                                           | 2.5                         | 0.59                                          |

<sup>a)</sup> All samples were calcined at 350 °C in air for 4 hrs and reduced at 300 °C in 5% Ar/H<sub>2</sub> for 2 hrs before BET characterization; <sup>b)</sup> Pore sizes were determined from BJH pore size distribution.

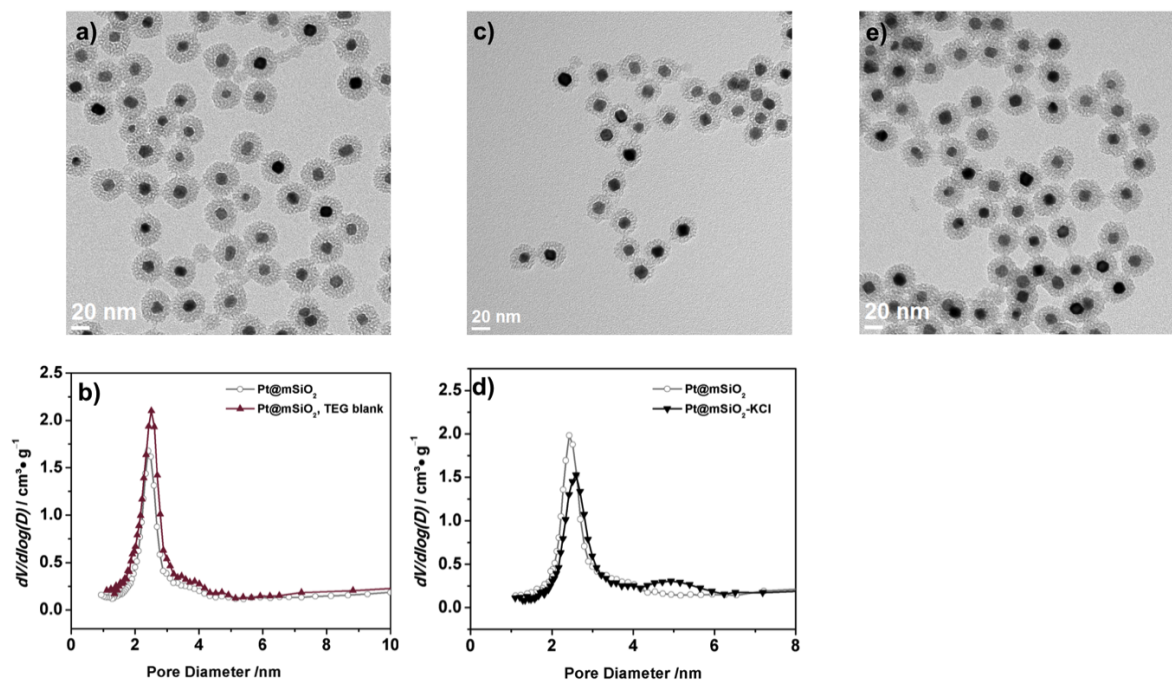

**Figure S2.** a) TEM image of Pt@mSiO<sub>2</sub> blank control in TEG; b) Pore size distributions of Pt@mSiO<sub>2</sub> (hollow circles) and Pt@mSiO<sub>2</sub>-blank control (russet triangles); c) TEM image of Pt@mSiO<sub>2</sub> with the addition of 4 equivalents of KCl in TEG using the same heating program employed for the synthesis of PtPd@mSiO<sub>2</sub>; and d) Pore size distributions of Pt@mSiO<sub>2</sub> (hollow circles) and Pt@mSiO<sub>2</sub>-KCl control (black down triangles); and e) PtPd@mSiO<sub>2</sub> after Pd etched by HNO<sub>3</sub> when using fresh PtPd@mSiO<sub>2</sub> in solution without drying as the starting material.



**Table S2.** Summary of Si contents in the supernatant solutions of various samples.

| Entry | Sample               | Si contents (mg/mL) |
|-------|----------------------|---------------------|
| 1     | TEG blank during ICP | $0.14 \pm 0.04$     |
| 2     | TEG control          | $0.21 \pm 0.01$     |
| 3     | Pt/TEG               | $0.24 \pm 0.02$     |
| 4     | PtPd/TEG             | $0.29 \pm 0.01$     |

The TEG blank (Entry 1, Table S2) corrects the baseline "Si contents" from COH interference as with the same TEG concentration as in our samples. Entry 2-3 in Table S2 are control samples that have been treated under the same synthetic conditions as the PtPd NPs (Entry 4). The Si contents in the three samples were evaluated as shown in the Table S2: for Entry 2, only TEG presents without the addition of either Pt@mSiO<sub>2</sub> seeds or K<sub>2</sub>PdCl<sub>4</sub> salts; for Entry 3, Pt@mSiO<sub>2</sub> seeds presents alone in TEG; and for Entry 4, typical synthetic conditions with Pt@mSiO<sub>2</sub> seeds and K<sub>2</sub>PdCl<sub>4</sub> salts. The Si content in each Entry was measured and averaged from three samples prepared in three independent experiments.

The entry 2 shows increasing Si content comparing to TEG blank, which suggests that the glass container for synthesis is a source of Si. When only Pt@mSiO<sub>2</sub> seeds present (Entry 3, Table S2), the amount of Si contents do not soar up much compared with TEG control (Entry 2). However, the sample in Entry 4 shows an obvious increase of Si when Pd salt was introduced to Pt@mSiO<sub>2</sub> seeds, which might indicate that mSiO<sub>2</sub> was etched during synthesis. It is notable that TEG interference will strongly shield Si signal and it is uncertain to avoid the mSiO<sub>2</sub> residues during the centrifugation process to separate the supernatant. Even though the exact quantities of Si contents may have some uncertainty, the trend of Si content increasing is consistent during the Pd deposition, which supports the mSiO<sub>2</sub> etching mechanism.

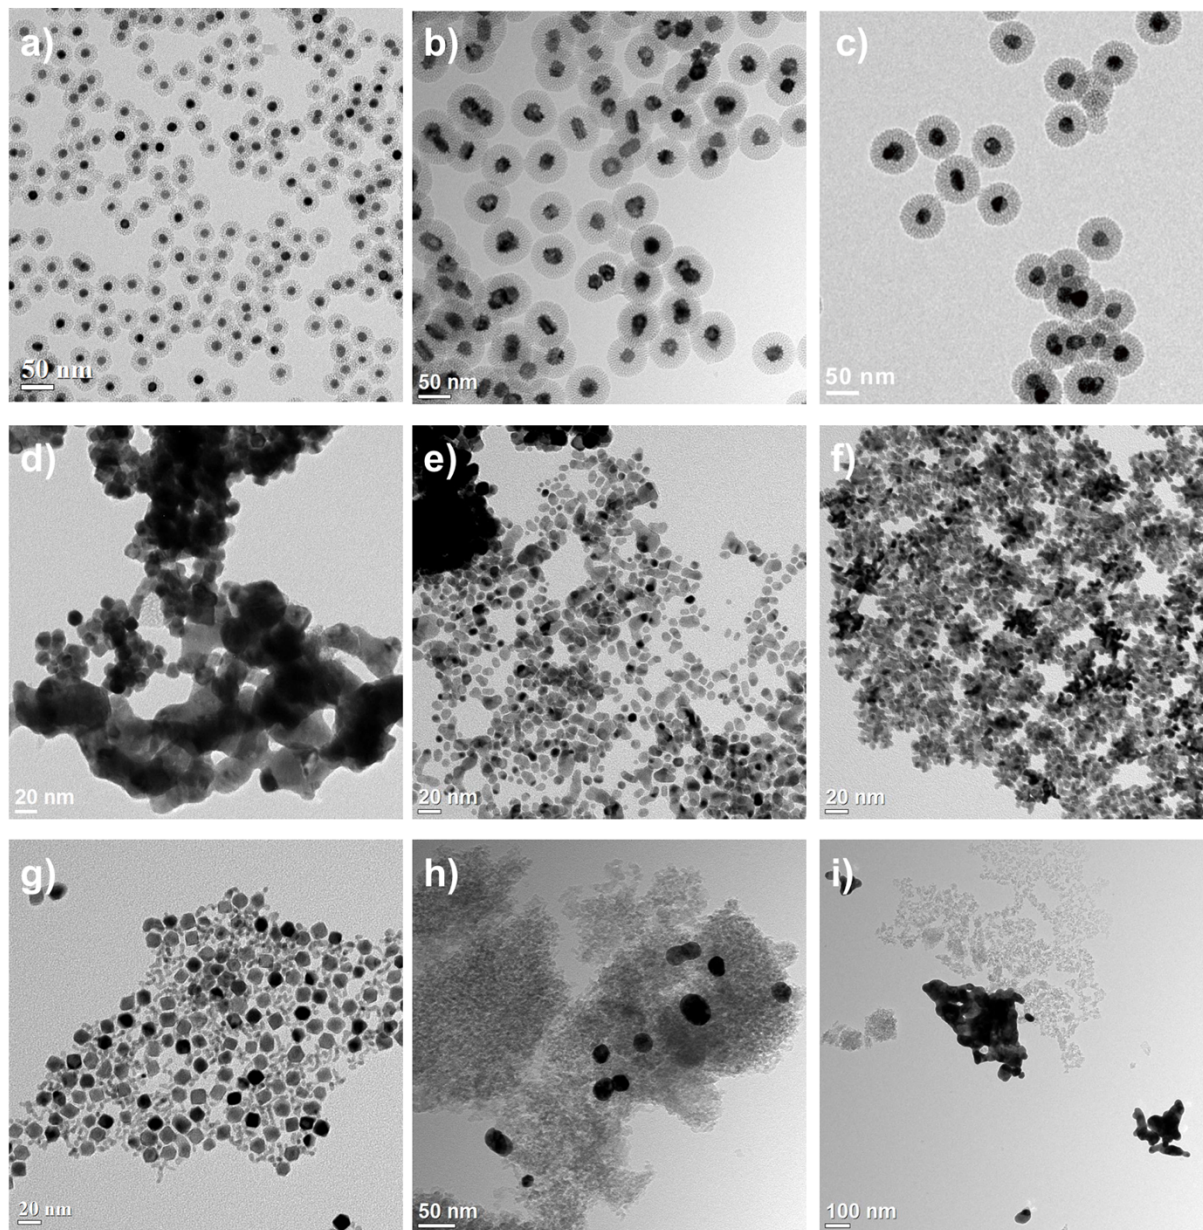

**Figure S3.** TEM images of a) PtPd@mSiO<sub>2</sub> synthesized by reducing Pt@mSiO<sub>2</sub> with Pd(acac)<sub>2</sub> in TEG; b) PdPt@mSiO<sub>2</sub> synthesized by reducing Pd@mSiO<sub>2</sub> and H<sub>2</sub>PtCl<sub>6</sub> in TEG (slightly isolated NPs observed); c) PdPt@mSiO<sub>2</sub> by reducing Pd@mSiO<sub>2</sub> and H<sub>2</sub>PtCl<sub>6</sub> in oleylamine; d) Pt NPs and K<sub>2</sub>PdCl<sub>4</sub> directly reduced in TEG without the addition of organic capping agents and without mSiO<sub>2</sub> shell protection; e) Pt NPs, K<sub>2</sub>PdCl<sub>4</sub> and additional PVP (80 equivalent molar ratio to Pt) reduced in TEG; f) Flower-like PdPt NPs by reducing Pd NPs and H<sub>2</sub>PtCl<sub>6</sub> in oleylamine; g) Pt NPs and Pd(acac)<sub>2</sub> reduced in oleylamine; h), i) Flower-like PdPt NPs supported on silica gel after 350 °C calcination and 300°C reduction.

**Table S3.** ICP-MS results of all PtM@mSiO<sub>2</sub> nanostructures (M=Pd, Ni, Cu and Rh).

| Items                                         | Added Pt/M, molar | Major metal /wt.% | Secondary metal /wt.% | Actual M/Pt, molar  |
|-----------------------------------------------|-------------------|-------------------|-----------------------|---------------------|
| Pt@mSiO <sub>2</sub>                          | –                 | 42% Pt            | –                     | –                   |
| Pd@mSiO <sub>2</sub>                          | –                 | 38% Pd            | –                     | –                   |
| PtPd <sub>0.50</sub> @mSiO <sub>2</sub>       | 1:0.5 Pt/Pd       | 28% Pt            | 7.5% Pd               | 1:0.50 Pt/Pd        |
| PtPd <sub>0.74</sub> @mSiO <sub>2</sub>       | 1:0.7 Pt/Pd       | 28% Pt            | 11% Pd                | 1:0.74 Pt/Pd        |
| PtPd <sub>1.1</sub> @mSiO <sub>2</sub>        | 1:1 Pt/Pd         | 31% Pt            | 18% Pd                | 1:1.1 Pt/Pd         |
| PtPd <sub>1.6</sub> @mSiO <sub>2</sub>        | 1:1.6 Pt/Pd       | 30% Pt            | 27% Pd                | 1:1.67 Pt/Pd        |
| PdPt <sub>0.48</sub> @mSiO <sub>2</sub>       | 0.5:1 Pt/Pd       | 19% Pt            | 22% Pd                | 0.48:1 Pt/Pd        |
| PdPt <sub>1.1</sub> @mSiO <sub>2</sub>        | 1:1 Pt/Pd         | –                 | –                     | 1.1: 1 Pt/Pd        |
| PtPd@mSiO <sub>2</sub> -Pd(acac) <sub>2</sub> | 1:1 Pt/Pd         | –                 | –                     | 1:(0.5 – 0.7) Pt/Pd |
| PtNi@mSiO <sub>2</sub>                        | 1:1 Pt/Ni         | 28% Pt            | 8.0% Ni               | 1:0.96 Pt/Ni        |
| PtCu@mSiO <sub>2</sub>                        | 1:1 Pt/Cu         | 31% Pt            | 6.8% Cu               | 1:0.68 Pt/Cu        |
| PtRh@mSiO <sub>2</sub>                        | 1:1 Pt/Rh         | 22% Pt            | 12% Rh                | 1:1.1 Pt/Rh         |

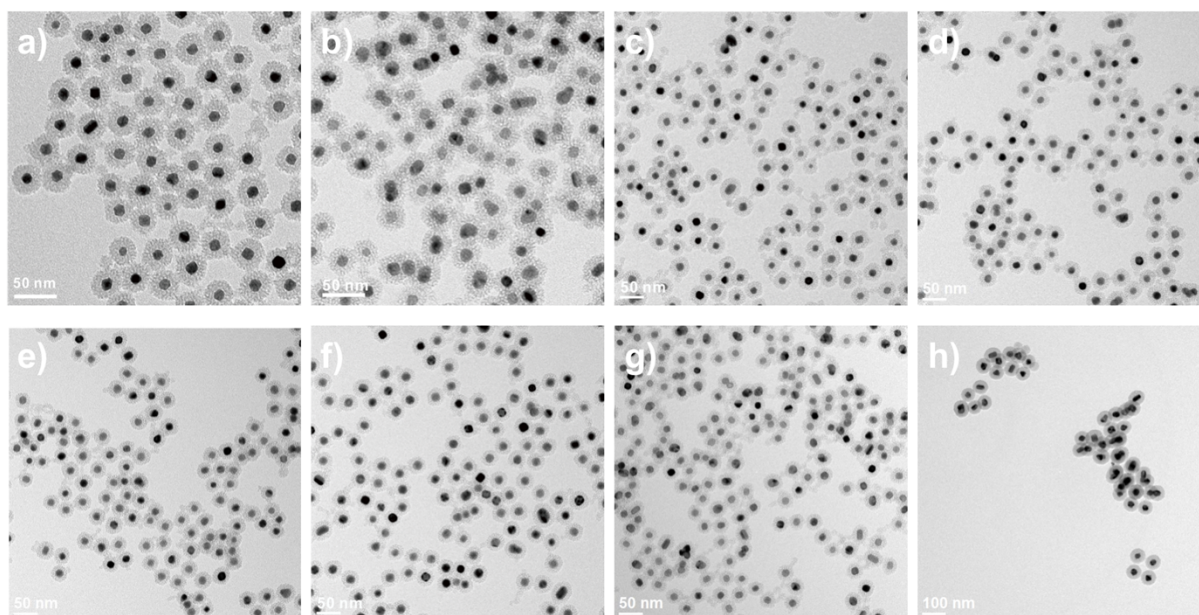

**Figure S4.** TEM images of a) Pt@mSiO<sub>2</sub>; b) Pd@mSiO<sub>2</sub>; c) PtPd<sub>0.50</sub>@mSiO<sub>2</sub>; d) PtPd<sub>0.74</sub>@mSiO<sub>2</sub>; e) PtPd<sub>1.1</sub>@mSiO<sub>2</sub>; f) PtPd<sub>1.6</sub>@mSiO<sub>2</sub>; g) PdPt<sub>0.48</sub>@mSiO<sub>2</sub>; and h) PdPt<sub>1.1</sub>@mSiO<sub>2</sub>.

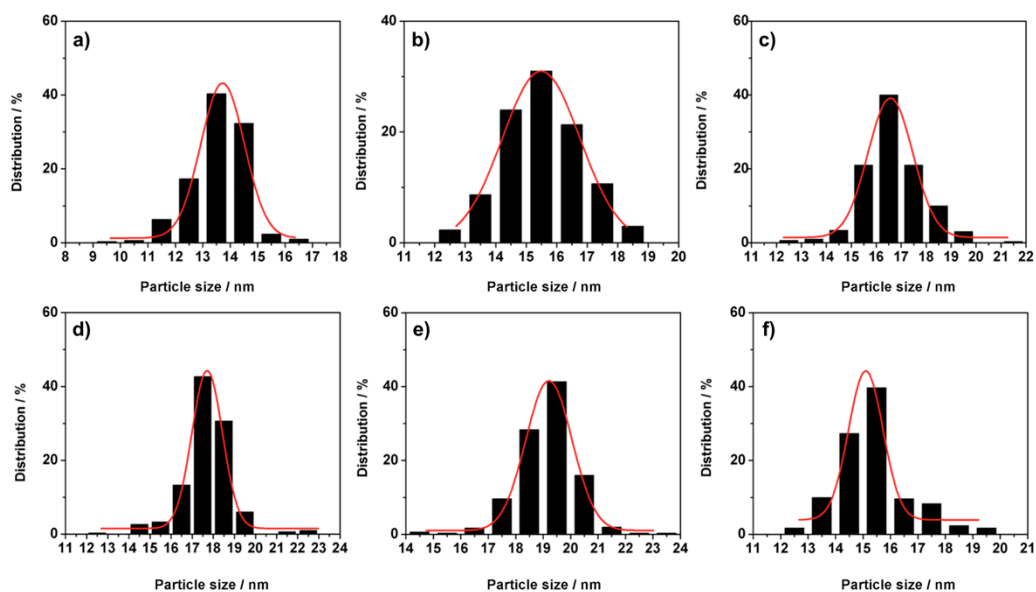

**Figure S5.** Particle size distributions are acquired by counting 300 particles in TEM images of corresponding samples as shown in Figure S4, a) Pt@mSiO<sub>2</sub> (13.6 ± 1.0 nm); b) PtPd<sub>0.50</sub>@mSiO<sub>2</sub> (15.5 ± 1.3 nm); c) PtPd<sub>0.74</sub>@mSiO<sub>2</sub> (16.7 ± 1.2 nm); d) PtPd<sub>1.1</sub>@mSiO<sub>2</sub> (17.7 ± 1.2 nm); e) PtPd<sub>1.6</sub>@mSiO<sub>2</sub> (19.1 ± 1.1 nm); and f) PdPt<sub>0.48</sub>@mSiO<sub>2</sub> (15.4 ± 1.3 nm).

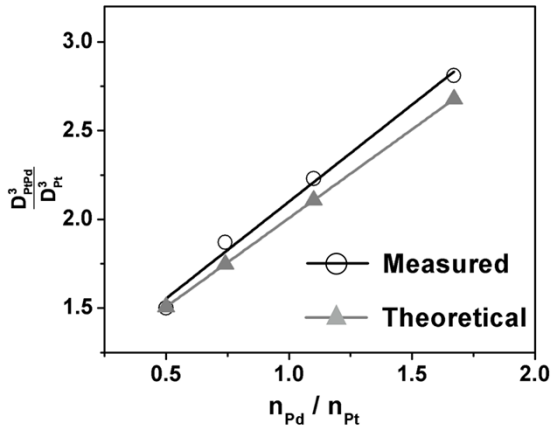

**Measured:**

$$\frac{D_{PtPd}^3}{D_{Pt}^3} = 1.1 \frac{n_{Pd}}{n_{Pt}} + 1.0$$

**Theoretical:**

$$\frac{D_{PtPd}^3}{D_{Pt}^3} = 1.0 \frac{n_{Pd}}{n_{Pt}} + 1.0$$

**Equation S1.** Mathematical conversion of measured (black circles) and theoretical slopes (grey triangles) in the above figure pertaining to Pd/Pt molar ratios and the volumetric increase of PtPd bimetallic cores.

#### Calculation details in equation S1:

Assuming both Pt and PtPd core are spherical in shape, the volume increase of PtPd core due to Pd contents depositing on Pt core can be interpreted based on metal core diameters as below, which is also the increase along the y-axis.

$$\frac{V_{PtPd} - V_{Pt}}{V_{Pt}} = \frac{V_{Pd}}{V_{Pt}} = \frac{D_{PtPd}^3 - D_{Pt}^3}{D_{Pt}^3}$$

And thus, it is possible to find the relationship between volume increase and Pd to Pt ratios in the above figure.

$$\frac{D_{PtPd}^3}{D_{Pt}^3} \propto \frac{n_{Pd}}{n_{Pt}}$$

The fitted linear relationship of measured data (black circles) is described as:

$$\frac{D_{PtPd}^3}{D_{Pt}^3} = 1.1 \frac{n_{Pd}}{n_{Pt}} + 1.0$$

The slope of the theoretical line (grey triangles) was calculated based on bulk Pt and Pt metal density as above:

$$\begin{aligned} \text{Theoretical Slope} &= \frac{D_{PtPd}^3 - D_{Pt}^3}{D_{Pt}^3} \frac{n_{Pt}}{n_{Pd}} = \frac{V_{Pd}}{V_{Pt}} \frac{n_{Pt}}{n_{Pd}} \\ &= \frac{M_w(\text{Pt}) d_{Pd}}{M_w(\text{Pd}) d_{Pt}} = \frac{195.1 \text{ g} \cdot \text{mol}^{-1}}{106.4 \text{ g} \cdot \text{mol}^{-1}} \frac{12 \text{ g} \cdot \text{cm}^{-3}}{21.4 \text{ g} \cdot \text{cm}^{-3}} = 1.0 \end{aligned}$$

So we can describe the theoretical line above as:

$$\frac{D_{PtPd}^3}{D_{Pt}^3} = 1.0 \frac{n_{Pd}}{n_{Pt}} + 1.0$$

The slopes of the theoretical line (1.0) and measure line (1.1) are fairly close, which indicates that Pd contents are introduced into Pt@mSiO<sub>2</sub> seed with high efficiency.

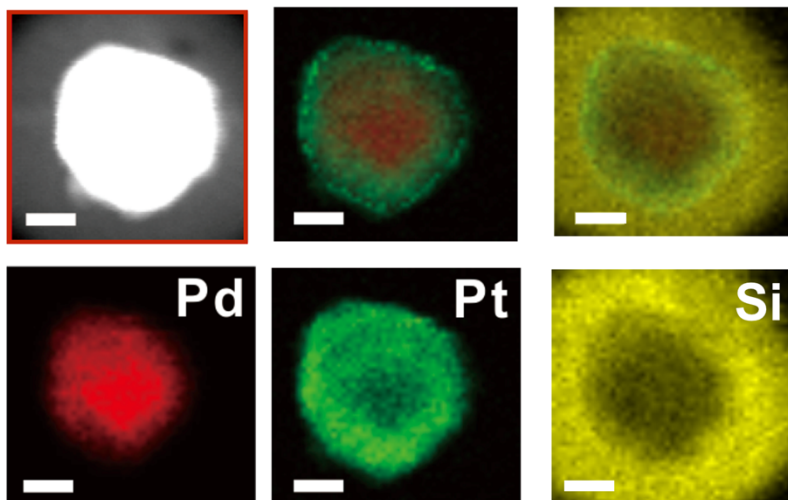

**Figure S6.** The Pt, Pd and Si elemental mappings of PdPt@mSiO<sub>2</sub>. The scale bars are all 10 nm. The PdPt core is almost resident within the mSiO<sub>2</sub> shell.



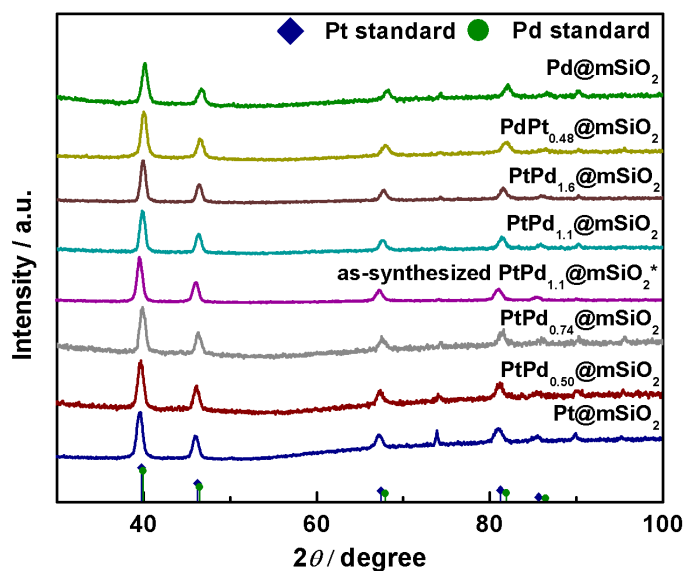

**Figure S7.** XRD patterns of PtPd@mSiO<sub>2</sub> samples with various Pt/Pd ratios after calcination and reduction.

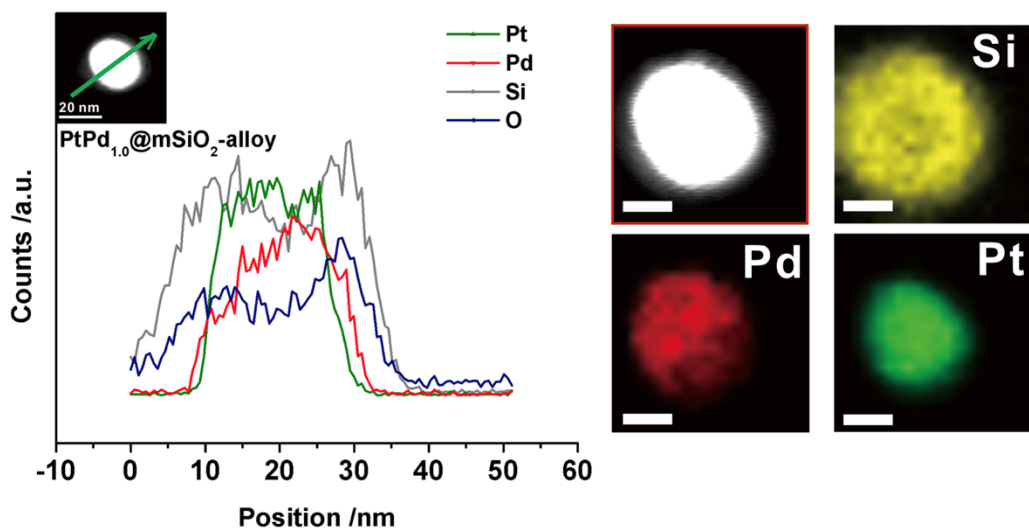

**Figure S8.** EDS line scans and elemental mappings of alloy PtPd@mSiO<sub>2</sub>. The scale bars in elemental mappings figure are all 10 nm.

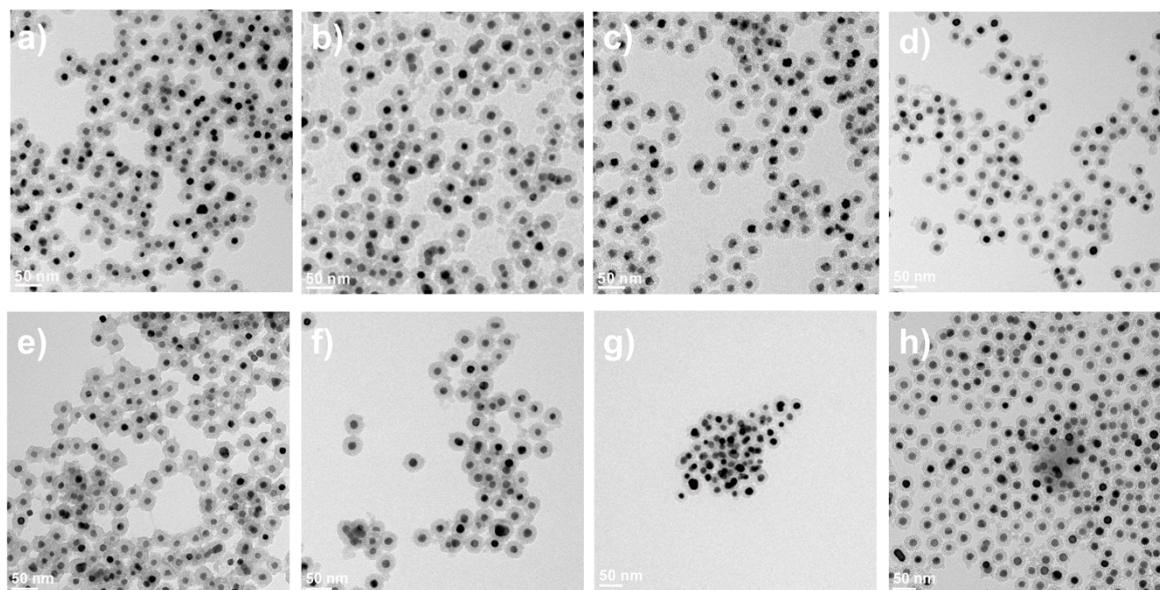

**Figure S9.** TEM images of as-synthesized PtM@mSiO<sub>2</sub>: a) PtNi@mSiO<sub>2</sub>; b) PtCu@mSiO<sub>2</sub>; c) PtRh@mSiO<sub>2</sub>; and d) PtPd<sub>1.1</sub>@mSiO<sub>2</sub>, and PtM@mSiO<sub>2</sub> after thermal treatment: e) PtNi@mSiO<sub>2</sub> after 350 °C annealing; f) PtCu@mSiO<sub>2</sub> after 350 °C annealing; g) PtRh@mSiO<sub>2</sub> after 500 °C annealing; and h) PtPd<sub>1.1</sub>@mSiO<sub>2</sub> after 350 °C annealing.

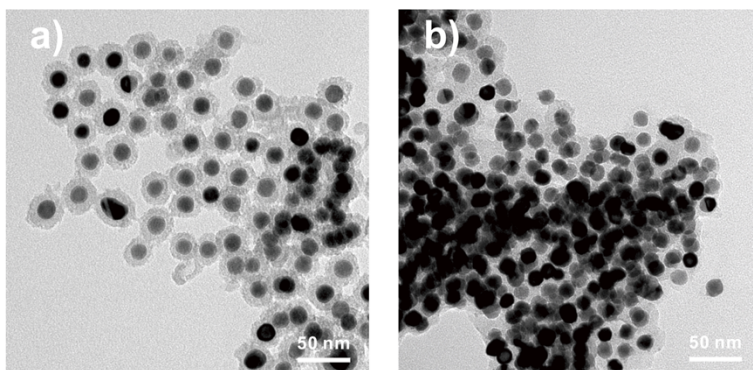

**Figure S10.** TEM image of a) PtPd@mSiO<sub>2</sub> after 350 °C calcination, 300 °C reduction and collected after reaction; and b) PtPd@mSiO<sub>2</sub> after 6 runs before catalyst deactivation.



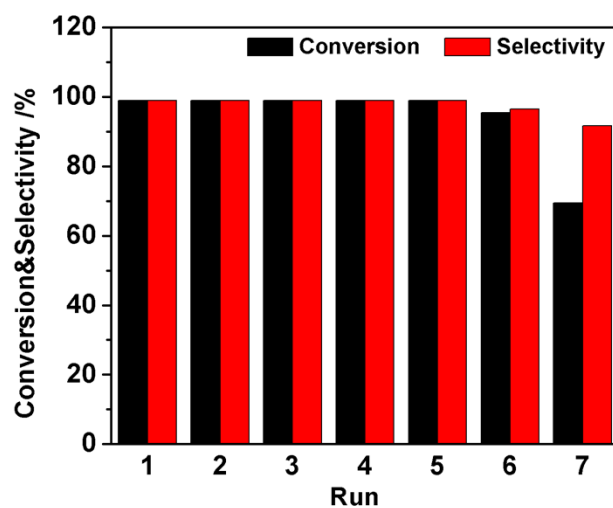

**Figure S11.** Conversion and selectivity of PtPd@mSiO<sub>2</sub> catalyst with 7 runs for nitrobenzene hydrogenation.

**Table S4.** The resuability of PtPd@mSiO<sub>2</sub> in nitrobenzene hydrogenation. <sup>a)</sup>

| Run number | Conversion (%) | Selectivity (%) |
|------------|----------------|-----------------|
| 1          | >99            | >99             |
| 2          | >99            | >99             |
| 3          | >99            | >99             |
| 4          | >99            | >99             |
| 5          | >99            | >99             |
| 6          | 95.4           | 96.5            |
| 7          | 69.5           | 91.7            |

<sup>a)</sup> All reaction conditions were controlled the same, and the catalyst was centrifuged down and used directly for the next cycle.

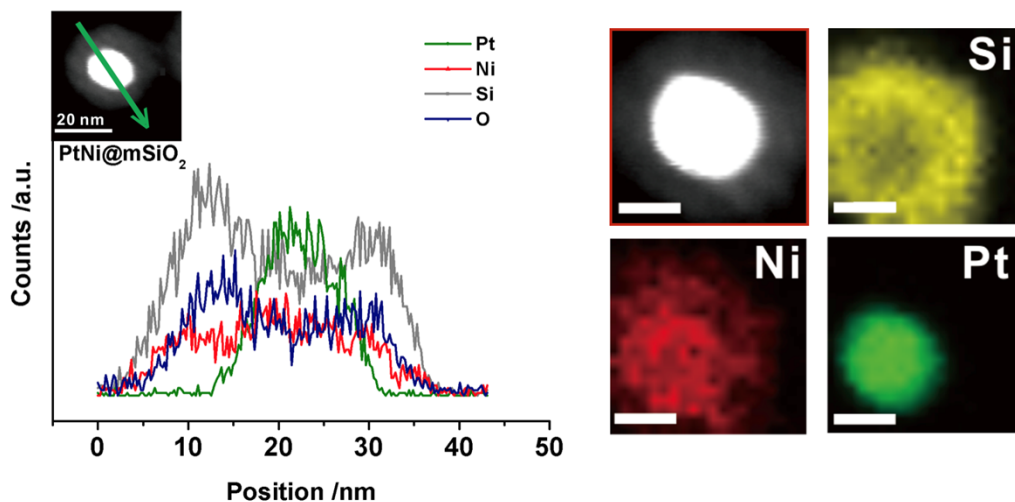

**Figure S12.** EDS line scans and elemental mappings of PtNi@mSiO<sub>2</sub>. The scale bars in elemental mappings figure are all 10 nm. Ni is dominant around the area of the original Pt core, however some Ni signals are observed spreading within the mSiO<sub>2</sub> framework.

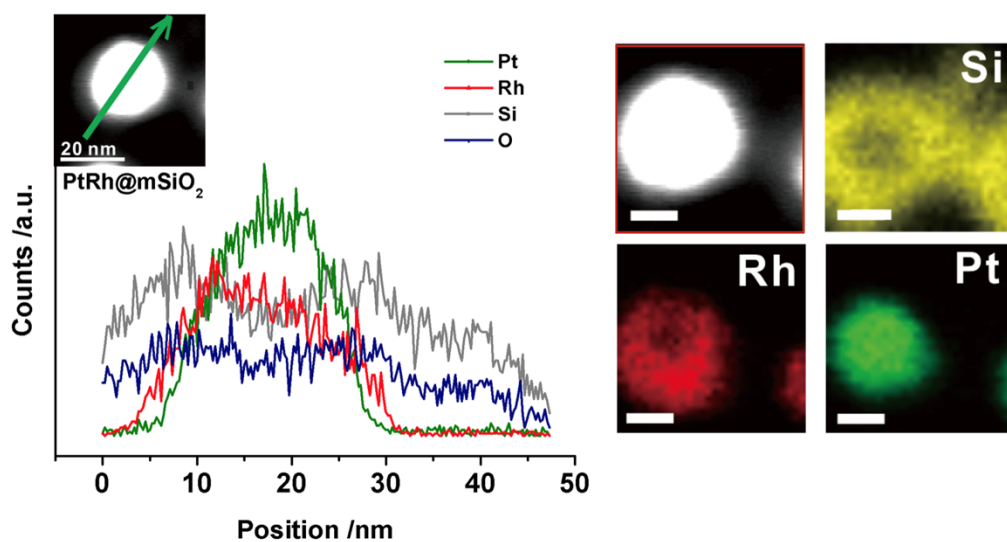

**Figure S13.** EDS line scans and elemental mappings of PtRh@mSiO<sub>2</sub>. The scale bars in elemental mappings figure are all 10 nm. Rh is deposited on the Pt core to form the Pt core/Rh shell structure. Rh signals are mixed well with Pt at 10-25 nm region, which indicates that PtRh alloy phase is also present.

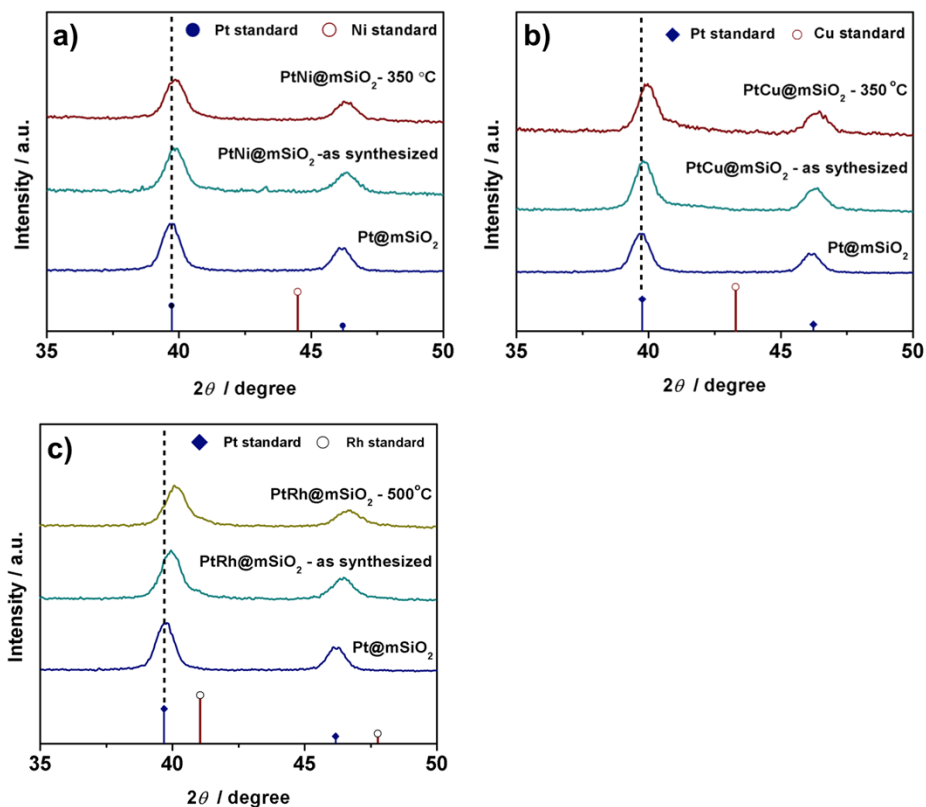

**Figure S14.** PXRD patterns of as-synthesized and annealed PtM@mSiO<sub>2</sub> samples: a) PtNi@mSiO<sub>2</sub>; b) PtCu@mSiO<sub>2</sub>; and c) PtRh@mSiO<sub>2</sub>.

## References

1. S. H. Joo, J. Y. Park, C. K. Tsung, Y. Yamada, P. Yang, G. A. Somorjai, *Nat. Mater.* **2009**, *8*, 126–131.
2. N. Ortiz, R. G. Weiner, S. E. Skrabalak, *ACS Nano* **2014**, *8*, 12461–12467.
3. Y. Gao, C. Wang, J. Guan, D. Ma, Xinhe Bao, *Chem. Commun.* **2011**, *47*, 2432–2434.
